# Supplementary material
Source: bioRxiv or medRxiv preprint supplement (https://medrxiv.org/highwire/filestream/79305/field_highwire_adjunct_files/0/2020.04.25.20079491-1.pdf)
Supplement: Supplementary file [file 2020.04.25.20079491-1.pdf]

# Supplementary file

## Models – main analysis

### Multivariable negative binomial regression model for COVID19 mortality rate for local authorities in England (Model 1)

|                                                  | IRR    | St.Err.  | t-value              | p-value | [95% Conf | Interval] | Sig |
|--------------------------------------------------|--------|----------|----------------------|---------|-----------|-----------|-----|
| Duration (days)                                  | 1.000  | 0.007    | -0.06                | 0.949   | 0.985     | 1.014     |     |
| Aged 50-79 (%)                                   | 1.031  | 0.019    | 1.69                 | 0.091   | 0.995     | 1.069     | *   |
| Aged 80+ (%)                                     | 0.917  | 0.064    | -1.25                | 0.212   | 0.800     | 1.051     |     |
| Population density (10,000 pop/km <sup>2</sup> ) | 1.157  | 0.188    | 0.90                 | 0.368   | 0.842     | 1.591     |     |
| BAME (%)                                         | 1.014  | 0.004    | 3.77                 | <0.001  | 1.007     | 1.022     | *** |
| Constant                                         | 0.000  | 0.000    | -17.01               | <0.001  | 0.000     | 0.000     | *** |
| Constant                                         | -1.999 | 0.126    | .b                   | .b      | -2.245    | -1.752    |     |
| Mean dependent var                               |        | 110.170  | SD dependent var     |         |           | 88.959    |     |
| Pseudo r-squared                                 |        | 0.027    | Number of obs        |         |           | 147.000   |     |
| Chi-square                                       |        | 40.100   | Prob > chi2          |         |           | 0.000     |     |
| Akaike crit. (AIC)                               |        | 1468.881 | Bayesian crit. (BIC) |         |           | 1489.814  |     |

\*\*\*  $p < 0.01$ , \*\*  $p < 0.05$ , \*  $p < 0.1$

BAME = Black, Asian and Minority Ethnic; IRR = incident rate ratio

### Multivariable negative binomial regression model for COVID19 mortality rate for local authorities in England (Model 2)

|                                                  | IRR    | St.Err.  | t-value              | p-value | [95% Conf | Interval] | Sig |
|--------------------------------------------------|--------|----------|----------------------|---------|-----------|-----------|-----|
| Duration (days)                                  | 1.018  | 0.009    | 2.13                 | 0.033   | 1.001     | 1.036     | **  |
| Aged 50-79 (%)                                   | 1.002  | 0.017    | 0.14                 | 0.890   | 0.969     | 1.037     |     |
| Aged 80+ (%)                                     | 0.936  | 0.067    | -0.93                | 0.355   | 0.813     | 1.077     |     |
| Population density (10,000 pop/km <sup>2</sup> ) | 1.183  | 0.203    | 0.98                 | 0.326   | 0.846     | 1.655     |     |
| Deprivation (%)                                  | 1.024  | 0.009    | 2.70                 | 0.007   | 1.006     | 1.042     | *** |
| Constant                                         | 0.000  | 0.000    | -15.40               | <0.001  | 0.000     | 0.000     | *** |
| Constant                                         | -1.945 | 0.125    | .b                   | .b      | -2.190    | -1.701    |     |
| Mean dependent var                               |        | 110.170  | SD dependent var     |         |           | 88.959    |     |
| Pseudo r-squared                                 |        | 0.022    | Number of obs        |         |           | 147.000   |     |
| Chi-square                                       |        | 33.158   | Prob > chi2          |         |           | 0.000     |     |
| Akaike crit. (AIC)                               |        | 1475.823 | Bayesian crit. (BIC) |         |           | 1496.756  |     |

\*\*\*  $p < 0.01$ , \*\*  $p < 0.05$ , \*  $p < 0.1$

BAME = Black, Asian and Minority Ethnic; IRR = incident rate ratio

**Multivariable negative binomial regression model for COVID19 mortality rate for local authorities in England (Model 3)**

|                                                  | IRR    | St.Err.  | t-value              | p-value | [95% Conf | Interval] | Sig |
|--------------------------------------------------|--------|----------|----------------------|---------|-----------|-----------|-----|
| Duration (days)                                  | 1.010  | 0.008    | 1.24                 | 0.215   | 0.994     | 1.027     |     |
| Aged 50-79 (%)                                   | 1.030  | 0.018    | 1.64                 | 0.100   | 0.994     | 1.067     |     |
| Aged 80+ (%)                                     | 0.937  | 0.064    | -0.95                | 0.342   | 0.820     | 1.071     |     |
| Population density (10,000 pop/km <sup>2</sup> ) | 1.068  | 0.172    | 0.41                 | 0.683   | 0.779     | 1.465     |     |
| BAME (%)                                         | 1.014  | 0.004    | 3.74                 | <0.001  | 1.007     | 1.021     | *** |
| Deprivation (%)                                  | 1.022  | 0.009    | 2.64                 | 0.008   | 1.006     | 1.039     | *** |
| Constant                                         | 0.000  | 0.000    | -16.61               | <0.001  | 0.000     | 0.000     | *** |
| Constant                                         | -2.048 | 0.127    | .b                   | .b      | -2.296    | -1.801    |     |
| Mean dependent var                               |        | 110.170  | SD dependent var     |         |           | 88.959    |     |
| Pseudo r-squared                                 |        | 0.031    | Number of obs        |         |           | 147.000   |     |
| Chi-square                                       |        | 46.991   | Prob > chi2          |         |           | 0.000     |     |
| Akaike crit. (AIC)                               |        | 1463.991 | Bayesian crit. (BIC) |         |           | 1487.914  |     |

\*\*\*  $p < 0.01$ , \*\*  $p < 0.05$ , \*  $p < 0.1$

BAME = Black, Asian and Minority Ethnic; IRR = incident rate ratio

## Statistical model

### Equation for negative binomial regression Model 3

$$\log(Y_i) = \beta_0 + \beta_1 Duration_i + \beta_2 Age50\_79_i + \beta_3 Age80plus_i + \beta_4 PopDensity_i + \beta_5 BAME_i + \beta_6 Deprivation_i + \log(population_i)$$

Where  $Y_i$  is the number of COVID19 deaths for local authority  $i$ . *Duration* is the number of days from when each local authority had at least 10 laboratory confirmed COVID19 cases to the 22nd April 2020. *Age50\_79* is the percent of the population aged 50-79 years. *Age80plus* is the percent of the population aged 80+ years. *PopDensity* is the number of people per square kilometre expressed in terms of 10,000 people/km<sup>2</sup>. *BAME* is the percent of the population who classify their ethnic group as: Black, Asian, Mixed or Other. *Deprivation* is the percent of the population experiencing deprivation relating to low income. *Population* is an offset variable with a parameter estimate constrained to 1.

## Robustness test – excluding local authorities in London

### Multivariable negative binomial regression model for COVID19 mortality rate for local authorities in England – excluding local authorities in London

|                                                     | IRR    | St.Err.  | t-value              | p-value | [95% Conf | Interval] | Sig |
|-----------------------------------------------------|--------|----------|----------------------|---------|-----------|-----------|-----|
| Duration (days)                                     | 1.013  | 0.009    | 1.48                 | 0.139   | 0.996     | 1.030     |     |
| Aged 50-79 (%)                                      | 1.068  | 0.026    | 2.72                 | 0.006   | 1.019     | 1.120     | *** |
| Aged 80+ (%)                                        | 0.844  | 0.067    | -2.14                | 0.032   | 0.723     | 0.986     | **  |
| Population density<br>(10,000 pop/km <sup>2</sup> ) | 2.266  | 0.993    | 1.87                 | 0.062   | 0.959     | 5.350     | *   |
| BAME (%)                                            | 1.013  | 0.006    | 2.11                 | 0.035   | 1.001     | 1.025     | **  |
| Deprivation (%)                                     | 1.023  | 0.011    | 2.14                 | 0.032   | 1.002     | 1.044     | **  |
| Constant                                            | 0.000  | 0.000    | -14.82               | <0.001  | 0.000     | 0.000     | *** |
| Constant                                            | -2.054 | 0.144    | .b                   | .b      | -2.337    | -1.771    |     |
| Mean dependent var                                  |        | 107.200  | SD dependent var     |         |           | 97.701    |     |
| Pseudo r-squared                                    |        | 0.027    | Number of obs        |         |           | 115.000   |     |
| Chi-square                                          |        | 30.783   | Prob > chi2          |         |           | 0.000     |     |
| Akaike crit. (AIC)                                  |        | 1131.544 | Bayesian crit. (BIC) |         |           | 1153.503  |     |

\*\*\*  $p < 0.01$ , \*\*  $p < 0.05$ , \*  $p < 0.1$

BAME = Black, Asian and Minority Ethnic; IRR = incident rate ratio

## Robustness test – using linear regression model

### Multivariable linear regression model for COVID19 mortality rate per 100,000 population for local authorities in England

|                                                     | Coef.   | St.Err.  | t-value              | p-value | [95% Conf | Interval] | Sig |
|-----------------------------------------------------|---------|----------|----------------------|---------|-----------|-----------|-----|
| Duration (days)                                     | 0.378   | 0.234    | 1.61                 | 0.109   | -0.085    | 0.841     |     |
| Aged 50-79 (%)                                      | 0.904   | 0.501    | 1.80                 | 0.073   | -0.086    | 1.894     | *   |
| Aged 80+ (%)                                        | -1.563  | 1.973    | -0.79                | 0.429   | -5.464    | 2.338     |     |
| Population density<br>(10,000 pop/km <sup>2</sup> ) | 0.879   | 4.463    | 0.20                 | 0.844   | -7.946    | 9.703     |     |
| BAME (%)                                            | 0.464   | 0.103    | 4.49                 | <0.001  | 0.260     | 0.669     | *** |
| Deprivation (%)                                     | 0.683   | 0.245    | 2.79                 | 0.006   | 0.199     | 1.167     | *** |
| Constant                                            | -22.554 | 16.053   | -1.41                | 0.162   | -54.292   | 9.184     |     |
| Mean dependent var                                  |         | 30.346   | SD dependent var     |         |           | 12.820    |     |
| R-squared                                           |         | 0.313    | Number of obs        |         |           | 147.000   |     |
| F-test                                              |         | 10.630   | Prob > F             |         |           | 0.000     |     |
| Akaike crit. (AIC)                                  |         | 1124.974 | Bayesian crit. (BIC) |         |           | 1145.907  |     |

\*\*\*  $p < 0.01$ , \*\*  $p < 0.05$ , \*  $p < 0.1$

BAME = Black, Asian and Minority Ethnic

## Robustness test – association between the proportion of the population from Black ethnic backgrounds and COVID19 mortality

### Multivariable negative binomial regression model for COVID19 mortality rate for local authorities in England

|                                                  | IRR    | St.Err.  | t-value              | p-value | [95% Conf | Interval] | Sig |
|--------------------------------------------------|--------|----------|----------------------|---------|-----------|-----------|-----|
| Duration (days)                                  | 1.013  | 0.009    | 1.56                 | 0.120   | 0.997     | 1.030     |     |
| Aged 50-79 (%)                                   | 1.009  | 0.017    | 0.54                 | 0.589   | 0.976     | 1.044     |     |
| Aged 80+ (%)                                     | 0.960  | 0.068    | -0.58                | 0.561   | 0.836     | 1.102     |     |
| Population density (10,000 pop/km <sup>2</sup> ) | 1.007  | 0.173    | 0.04                 | 0.969   | 0.719     | 1.410     |     |
| Proportion Black ethnicity (%)                   | 1.026  | 0.009    | 2.73                 | 0.006   | 1.007     | 1.044     | *** |
| Deprivation (%)                                  | 1.024  | 0.009    | 2.80                 | 0.005   | 1.007     | 1.041     | *** |
| Constant                                         | 0.000  | 0.000    | -16.13               | 0.000   | 0.000     | 0.000     | *** |
| Constant                                         | -2.001 | 0.126    | .b                   | .b      | -2.247    | -1.755    |     |
| Mean dependent var                               |        | 110.170  | SD dependent var     |         |           | 88.959    |     |
| Pseudo r-squared                                 |        | 0.027    | Number of obs        |         |           | 147.000   |     |
| Chi-square                                       |        | 40.671   | Prob > chi2          |         |           | 0.000     |     |
| Akaike crit. (AIC)                               |        | 1470.311 | Bayesian crit. (BIC) |         |           | 1494.234  |     |

\*\*\*  $p < 0.01$ , \*\*  $p < 0.05$ , \*  $p < 0.1$

IRR = incident rate ratio

## Robustness tests – using ONS mortality figures up to 10th April 2020

### Multivariable negative binomial regression model for COVID19 mortality rate for local authorities in England (Model 1) – using ONS mortality data

|                                                  | IRR    | St.Err.  | t-value              | p-value | [95% Conf | Interval] | Sig |
|--------------------------------------------------|--------|----------|----------------------|---------|-----------|-----------|-----|
| Duration (days)                                  | 1.018  | 0.008    | 2.13                 | 0.033   | 1.001     | 1.035     | **  |
| Aged 50-79 (%)                                   | 1.020  | 0.020    | 0.98                 | 0.325   | 0.981     | 1.060     |     |
| Aged 80+ (%)                                     | 0.970  | 0.074    | -0.40                | 0.693   | 0.836     | 1.126     |     |
| Population density (10,000 pop/km <sup>2</sup> ) | 1.409  | 0.255    | 1.90                 | 0.058   | 0.988     | 2.008     | *   |
| BAME (%)                                         | 1.017  | 0.004    | 4.30                 | <0.001  | 1.009     | 1.025     | *** |
| Constant                                         | 0.000  | 0.000    | -18.24               | <0.001  | 0.000     | 0.000     | *** |
| Constant                                         | -1.849 | 0.131    | .b                   | .b      | -2.105    | -1.592    |     |
| Mean dependent var                               |        | 67.068   | SD dependent var     |         |           | 52.276    |     |
| Pseudo r-squared                                 |        | 0.060    | Number of obs        |         |           | 147.000   |     |
| Chi-square                                       |        | 84.585   | Prob > chi2          |         |           | 0.000     |     |
| Akaike crit. (AIC)                               |        | 1340.725 | Bayesian crit. (BIC) |         |           | 1361.658  |     |

\*\*\*  $p < 0.01$ , \*\*  $p < 0.05$ , \*  $p < 0.1$

BAME = Black, Asian and Minority Ethnic; IRR = incident rate ratio

**Multivariable negative binomial regression model for COVID19 mortality rate for local authorities in England (Model 2) – using ONS mortality data**

|                                                  | IRR    | St.Err.  | t-value              | p-value | [95% Conf | Interval] | Sig |
|--------------------------------------------------|--------|----------|----------------------|---------|-----------|-----------|-----|
| Duration (days)                                  | 1.038  | 0.010    | 3.81                 | <0.001  | 1.018     | 1.059     | *** |
| Aged 50-79 (%)                                   | 0.987  | 0.019    | -0.69                | 0.491   | 0.950     | 1.025     |     |
| Aged 80+ (%)                                     | 0.984  | 0.079    | -0.20                | 0.841   | 0.840     | 1.152     |     |
| Population density (10,000 pop/km <sup>2</sup> ) | 1.531  | 0.302    | 2.16                 | 0.031   | 1.040     | 2.254     | **  |
| Deprivation (%)                                  | 1.021  | 0.010    | 2.12                 | 0.034   | 1.002     | 1.041     | **  |
| Constant                                         | 0.000  | 0.000    | -15.36               | <0.001  | 0.000     | 0.000     | *** |
| Constant                                         | -1.736 | 0.127    | .b                   | .b      | -1.985    | -1.486    |     |
| Mean dependent var                               |        | 67.068   | SD dependent var     |         |           | 52.276    |     |
| Pseudo r-squared                                 |        | 0.050    | Number of obs        |         |           | 147.000   |     |
| Chi-square                                       |        | 70.985   | Prob > chi2          |         |           | 0.000     |     |
| Akaike crit. (AIC)                               |        | 1354.325 | Bayesian crit. (BIC) |         |           | 1375.258  |     |

\*\*\*  $p < 0.01$ , \*\*  $p < 0.05$ , \*  $p < 0.1$

BAME = Black, Asian and Minority Ethnic; IRR = incident rate ratio

**Multivariable negative binomial regression model for COVID19 mortality rate for local authorities in England (Model 3) – using ONS mortality data**

|                                                  | IRR    | St.Err.  | t-value              | p-value | [95% Conf | Interval] | Sig |
|--------------------------------------------------|--------|----------|----------------------|---------|-----------|-----------|-----|
| Duration (days)                                  | 1.028  | 0.010    | 2.96                 | 0.003   | 1.009     | 1.047     | *** |
| Aged 50-79 (%)                                   | 1.019  | 0.020    | 0.98                 | 0.329   | 0.981     | 1.059     |     |
| Aged 80+ (%)                                     | 0.988  | 0.075    | -0.15                | 0.878   | 0.853     | 1.146     |     |
| Population density (10,000 pop/km <sup>2</sup> ) | 1.302  | 0.236    | 1.46                 | 0.146   | 0.913     | 1.856     |     |
| BAME (%)                                         | 1.017  | 0.004    | 4.34                 | <0.001  | 1.009     | 1.025     | *** |
| Deprivation (%)                                  | 1.020  | 0.009    | 2.20                 | 0.028   | 1.002     | 1.039     | **  |
| Constant                                         | 0.000  | 0.000    | -17.11               | <0.001  | 0.000     | 0.000     | *** |
| Constant                                         | -1.883 | 0.131    | .b                   | .b      | -2.140    | -1.626    |     |
| Mean dependent var                               |        | 67.068   | SD dependent var     |         |           | 52.276    |     |
| Pseudo r-squared                                 |        | 0.063    | Number of obs        |         |           | 147.000   |     |
| Chi-square                                       |        | 89.382   | Prob > chi2          |         |           | 0.000     |     |
| Akaike crit. (AIC)                               |        | 1337.928 | Bayesian crit. (BIC) |         |           | 1361.852  |     |

\*\*\*  $p < 0.01$ , \*\*  $p < 0.05$ , \*  $p < 0.1$

BAME = Black, Asian and Minority Ethnic; IRR = incident rate ratio
